# Supplementary material for: IGF2 improves the developmental competency and meiotic structure of oocytes from aged mice
Source: publisher site journal article supplement (doi:10.18632/aging.202214), 2020-12-09
Supplement: Supplementary file [file aging-v13i2-202214-supplementary-material-SD1.pdf]

## SUPPLEMENTARY TABLE

Supplementary Table 1. Primer sequences for qRT-PCR.

|              | Forward                 | Reverse                |
|--------------|-------------------------|------------------------|
| <i>IGF2</i>  | TTCTACTTCAGCAGGCCTTCAA  | ATATTGGAAGAACTTGCCCACG |
| <i>SIRT1</i> | CTGTTGACCGATGGACTCCT    | GCCACAGCGTCATATCATCC   |
| <i>BMP15</i> | TCCTTGCTGACGACCCTACAT   | TACCTCAGGGGATAGCCTTGG  |
| <i>GDF9</i>  | TCTTAGTAGCCTTAGCTCTCAGG | TGTCAGTCCCATCTACAGGCA  |
| <i>SOD1</i>  | GCTGTACCAGTGCAGGTCCTCA  | CATTTCCACCTTTGCCCAAGTC |
